# Supplementary material
Source: PubMed Central journal article supplement (PMC3289296)
Supplement: 1121470109_pnas.201121470SI.pdf [file 1121470109_pnas.201121470SI.pdf]

# Supporting Information

Boboila et al. 10.1073/pnas.1121470109

## SI Materials and Methods

**Generation of v-Abl-Transformed Pro-B Lines.** The v-Abl kinase-transformed pro-B cells were generated from total bone marrow cells of E $\mu$ -*Bcl2* transgenic *Xrcc4<sup>cl/c</sup>Xrcc1<sup>cl/c</sup>* mice. Retroviral end-joining reporters were generated by cloning the I-SceI-containing region from the viral GEJ reporter (1) into the pMX retroviral backbone (2). End-joining reporters were transduced into v-Abl-transformed pro-B lines, and clones were screened by Southern blotting for single substrate integration. Three clones (nos. 26, 27, and 150) with independent single I-SceI substrate integrations were treated with Tat-Cre (3) and screened for *Xrcc4<sup>-/-</sup>* and *Xrcc4<sup>-/-</sup>Xrcc1<sup>-/-</sup>* subclones. Two additional *Xrcc4<sup>-/-</sup>* clones (nos. 47 and 84) with single and independent I-SceI substrate integrations were also analyzed. I-SceI-GR fusion protein was introduced retrovirally, and nuclear translocation of I-SceI-GR was induced by treatment with 0.1  $\mu$ M triamcinolone acetonide (TA) for 4 d. GFP expression after successful joining was recorded by flow cytometry. I-SceI junctions were amplified from TA-treated v-Abl-transformed pro-B lines with primers 5'-GCCTCGATCCTCCCTTATC-3' and 5'-GCAAGCTGACCCTGAAGTTC-3', cloned, and sequenced.

**CH12F3 Cell Culture and shRNA-Mediated Knockdown.** CH12F3 cells were cultured in RPMI 1640 supplemented with 10% (vol/vol) FCS, 0.1 mM nonessential amino acids, 1 mM sodium pyruvate, 20 mM Hepes, 1% penicillin/streptomycin, 2 mM L-glutamine, and 5% (vol/vol) National Cancer Tissue Culture (NCTC)-109. Vesicular stomatitis virus glycoprotein G-pseudotyped lentiviral particles were generated by cotransfection of 293T cells with psPAX2 (Addgene), pMD2.G (Addgene), and pLKO.1-based shRNA vectors (The RNAi Consortium; Open Biosystems). CH12F3 cells were transduced in the presence of 8  $\mu$ g/mL polybrene and selected with 2  $\mu$ g/mL puromycin. For stimulation, cells were plated at  $5 \times 10^4$  cells/mL in CH12F3 medium sup-

plemented with 1  $\mu$ g/mL  $\alpha$ CD40, 1 ng/mL TGF- $\beta$ , 20 ng/mL IL-4, and 1  $\mu$ g/mL puromycin.

**S $\mu$ -S $\alpha$  Junction Analysis in CH12F3 Cells.** S $\mu$ -S $\alpha$  junctions were amplified from genomic DNA extracted from IL-4/ $\alpha$ CD40/TGF- $\beta$ -stimulated CH12F3 cells by nested PCR using previously established methods (4) and the following primers: PCR 1 (S $\mu$ 1, 5'-TAGTAAGCGAGGCTCTAAAAGCAT-3'; S $\alpha$ 1, 5'-CAGCAGTGAGTTTTAACAATCC-3') and PCR 2 (S $\mu$ 2, 5'-ATCGAATTCGCTTGAGCCAAAATGAAGTAGACT-3'; S $\alpha$ 2, 5'-CCGGAATTCCTCAGTGCACACTCTATCTAGGTCT-3').

**IgH/c-myc Translocation Analysis in CH12F3 Cells.** *IgH/c-myc* translocation junctions (der15) were PCR-amplified (5) from genomic DNA of CH12F3 cells stimulated with IL-4/ $\alpha$ CD40/TGF- $\beta$  for 3 d. Multiple aliquots of DNA corresponding to 100,000 cells were analyzed in separate reactions. Reactions were performed using the Expand Long Template PCR System (Roche). For the first-round of PCR, the following primers were used: S $\mu$ 5'1a (5'-ACTATGCTATGGACTACTGGGGTCAAG-3') and c-myc5'1a (5'-GTGAAAACCGACTGTGGCCCTGGAA-3'); conditions were 94  $^{\circ}$ C for 3 min, 94  $^{\circ}$ C for 15 s, 62  $^{\circ}$ C for 15 s, 68  $^{\circ}$ C for 7 min plus 20 s per cycle for 25 cycles, and 5 min at 68  $^{\circ}$ C for a final extension. For the second round of PCR, the following primers were used: S $\mu$ 5'1b (5'-CCTCAGTCACCGTCTCCTCAGGTA-3') and c-myc5'1b (5'-GTGGAGGTGTATGGGGTGTAGAC-3'); conditions were 94  $^{\circ}$ C for 3 min, 94  $^{\circ}$ C for 15 s, 62  $^{\circ}$ C for 15 s, 68  $^{\circ}$ C for 7 min for 25 cycles, and 68  $^{\circ}$ C for 5 min for a final extension. PCR products were electrophoresed on agarose gels and subjected to Southern blot analysis with an internal *c-myc* locus oligonucleotide probe (T11, 5'-GGACTGCGCAGGGAGACCTACAGGGG-3'). For multiple comparisons, one-way ANOVA and a Tukey posttest were used to determine statistical significance.

1. Xie A, Kwok A, Scully R (2009) Role of mammalian Mre11 in classical and alternative nonhomologous end joining. *Nat Struct Mol Biol* 16:814–818.
2. Bredemeyer AL, et al. (2006) ATM stabilizes DNA double-strand-break complexes during V(D)J recombination. *Nature* 442:466–470.
3. Zha S, et al. (2011) Ataxia telangiectasia-mutated protein and DNA-dependent protein kinase have complementary V(D)J recombination functions. *Proc Natl Acad Sci USA* 108:2028–2033.

4. Yan CT, et al. (2007) IgH class switching and translocations use a robust non-classical end-joining pathway. *Nature* 449:478–482.
5. Ramiro AR, et al. (2004) AID is required for c-myc/IgH chromosome translocations in vivo. *Cell* 118:431–438.

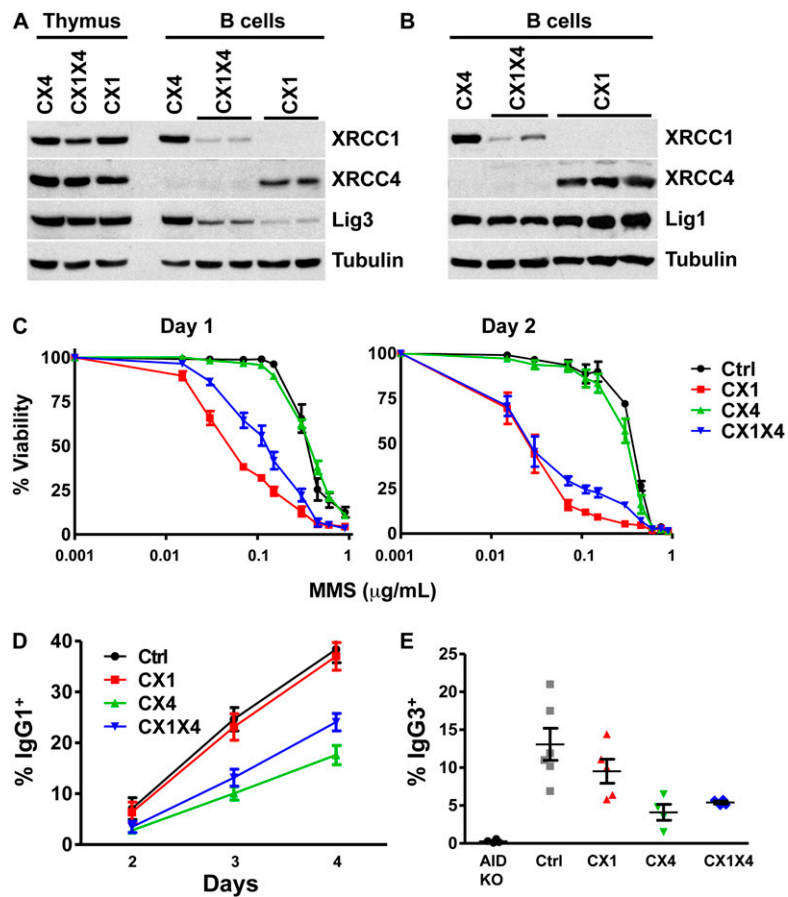

**Fig. 51.** Lig3 (A) and Lig1 (B) levels in *Xrcc1* and *Xrcc1/Xrcc4* conditionally deleted B cells. B cells were stimulated in culture with  $\alpha\text{CD40/IL-4}$  for 3 d. Cell lysates were analyzed using the indicated antibodies. Lig3 is reduced in *XRCC1*-deficient mature B cells. Lig1 levels are unaffected by *Xrcc1* and *Xrcc1/Xrcc4* deletion. (C) MMS survival curves of B cells of the indicated genotypes after 1 d (Left) or 2 d (Right) of culture with  $\alpha\text{CD40/IL-4}$ , followed by MMS treatment for 6 h. At least three mice per genotype were used for each MMS concentration. (D) Time course for IgG1 CSR in *XRCC1*-deficient and *XRCC1/XRCC4* double-deficient B cells. CX1, CX1X4, CX4, and Ctrl B cells were stimulated with  $\alpha\text{CD40/IL-4}$ , and IgG1 CSR was analyzed on days 2, 3, and 4 of stimulation by flow cytometry. At least four mice per genotype were used in independent experiments for each time point. (E) IgG3 CSR. B cells were stimulated with LPS plus  $\alpha\text{IgD}$ -dextran for 4 d. A total of six Ctrl, five CX1, four CX4, and four CX1X4 mice were analyzed in independent experiments. Data are means  $\pm$  SEM.





**Table S1. Summary of switch region junctions in splenic B cells stimulated with  $\alpha$ CD40/IL-4 for 4 d in culture**

| $S_{\mu}$ - $S_{\gamma}1$ | Dir.           | MH             | Dir. + MH | Ins. | Total | $S_{\mu}$ - $S_{\epsilon}$ | Dir.           | MH             | Dir. + MH | Ins. | Total |
|---------------------------|----------------|----------------|-----------|------|-------|----------------------------|----------------|----------------|-----------|------|-------|
| Ctrl 1                    | 7 (35.0)       | 13 (65.0)      | 20 (100)  | 2    | 22    | Ctrl 1                     | 7 (29.2)       | 17 (70.8)      | 24 (100)  | 10   | 34    |
| Ctrl 2                    | 5 (41.7)       | 7 (58.3)       | 12 (100)  | 3    | 15    | Ctrl 2                     | 6 (19.4)       | 25 (80.6)      | 31 (100)  | 5    | 36    |
|                           |                |                |           |      |       | Ctrl 3                     | 11 (36.7)      | 19 (63.3)      | 30 (100)  | 3    | 33    |
| Total                     | 12             | 20             | 32        | 5    | 37    | Total                      | 24             | 61             | 85        | 18   | 103   |
| Mean, %                   | 38.3           | 61.7           |           |      |       | Mean $\pm$ SEM, %          | 28.4 $\pm$ 5.0 | 71.6 $\pm$ 5.0 |           |      |       |
| CX1 1                     | 3 (42.9)       | 4 (57.1)       | 7 (100)   | 5    | 12    | CX1 1                      | 8 (40.0)       | 12 (60.0)      | 20 (100)  | 6    | 26    |
| CX1 2                     | 7 (46.7)       | 8 (53.3)       | 15 (100)  | 4    | 19    | CX1 2                      | 9 (30.0)       | 21 (70.0)      | 30 (100)  | 12   | 42    |
| CX1 3                     | 4 (33.3)       | 8 (66.7)       | 12 (100)  | 3    | 15    | CX1 3                      | 8 (47.1)       | 9 (52.9)       | 17 (100)  | 4    | 21    |
| CX1 4                     | 4 (28.6)       | 10 (71.4)      | 14 (100)  | 1    | 15    | CX1 4                      | 7 (36.8)       | 12 (63.2)      | 19 (100)  | 5    | 24    |
| Total                     | 18             | 30             | 48        | 13   | 61    | Total                      | 32             | 54             | 86        | 27   | 113   |
| Mean $\pm$ SEM, %         | 37.9 $\pm$ 4.2 | 62.1 $\pm$ 4.2 |           |      |       | Mean $\pm$ SEM, %          | 38.5 $\pm$ 3.5 | 61.5 $\pm$ 3.5 |           |      |       |
| CX4 1                     | 1 (3.8)        | 25 (96.2)      | 26 (100)  | 4    | 30    | CX4 1                      | 5 (18.5)       | 22 (81.5)      | 27 (100)  | 2    | 29    |
| CX4 2                     | 3 (12.5)       | 21 (87.5)      | 24 (100)  | 2    | 26    | CX4 2                      | 2 (11.1)       | 16 (88.9)      | 18 (100)  | 11   | 29    |
| Total                     | 4              | 46             | 50        | 6    | 56    | Total                      | 7              | 38             | 45        | 13   | 58    |
| Mean, %                   | 8.2            | 91.8           |           |      |       | Mean, %                    | 14.8           | 85.2           |           |      |       |
| CX1X4 1                   | 7 (23.3)       | 23 (76.7)      | 30 (100)  | 8    | 38    | CX1X4 1                    | 7 (35.0)       | 13 (65.0)      | 20 (100)  | 1    | 21    |
| CX1X4 2                   | 1 (16.7)       | 5 (83.3)       | 6 (100)   |      | 6     | CX1X4 2                    | 7 (25.9)       | 20 (74.0)      | 27 (100)  | 9    | 36    |
| Total                     | 8              | 28             | 36        | 8    | 44    | Total                      | 14             | 33             | 47        | 10   | 57    |
| Mean, %                   | 20.0           | 80.0           |           |      |       | Mean, %                    | 30.5           | 69.5           |           |      |       |
|                           |                |                |           |      |       | CL3 1                      | 10 (50.0)      | 10 (50.0)      | 20 (100)  | 9    | 29    |
|                           |                |                |           |      |       | CL3 2                      | 13 (48.1)      | 14 (51.9)      | 27 (100)  | 6    | 33    |
|                           |                |                |           |      |       | CL3 3                      | 7 (33.3)       | 14 (66.7)      | 21 (100)  | 3    | 24    |
|                           |                |                |           |      |       | Total                      | 30             | 38             | 68        | 18   | 86    |
|                           |                |                |           |      |       | Mean $\pm$ SEM, %          | 43.8 $\pm$ 5.3 | 56.2 $\pm$ 5.3 |           |      |       |

Percentages of direct (Dir.) and MH-mediated (MH) junctions are shown in parentheses. Percentages are calculated based on the total number of junctions, excluding insertions (Ins.).

**Table S2. Summary of *IgH* genomic instability assessed on metaphases from B cells stimulated with  $\alpha$ CD40/IL-4 for 4 d**

| Genotype          | Metaphases analyzed | <i>IgH</i> chromosome breaks | <i>IgH</i> translocations |
|-------------------|---------------------|------------------------------|---------------------------|
| Ctrl 1            | 117                 | 7 (6.0)                      | 4 (3.4)                   |
| Ctrl 2            | 109                 | 3 (2.8)                      | 1 (0.9)                   |
| Ctrl 3            | 106                 | 1 (0.9)                      | 0 (0.0)                   |
| Ctrl 4            | 108                 | 8 (7.4)                      | 3 (2.8)                   |
| Ctrl 5            | 110                 | 4 (3.6)                      | 1 (0.9)                   |
| Ctrl 6            | 110                 | 4 (3.6)                      | 0 (0.0)                   |
| Ctrl 7            | 106                 | 9 (8.5)                      | 1 (0.9)                   |
| Ctrl 8            | 111                 | 6 (5.4)                      | 3 (2.7)                   |
| Ctrl 9            | 131                 | 1 (0.8)                      | 0 (0.0)                   |
| Total             | 1,008               | 43                           | 13                        |
| Mean $\pm$ SEM, % |                     | 4.3 $\pm$ 0.9                | 1.3 $\pm$ 0.4             |
| CX1 1             | 112                 | 17 (15.2)                    | 6 (5.4)                   |
| CX1 2             | 116                 | 11 (9.5)                     | 5 (4.3)                   |
| CX1 3             | 100                 | 7 (7.0)                      | 2 (2.0)                   |
| CX1 4             | 104                 | 3 (2.9)                      | 2 (1.9)                   |
| CX1 5             | 108                 | 9 (8.3)                      | 3 (2.8)                   |
| CX1 6             | 105                 | 4 (3.8)                      | 0 (0.0)                   |
| CX1 7             | 106                 | 8 (7.5)                      | 2 (1.9)                   |
| CX1 8             | 106                 | 8 (7.5)                      | 4 (3.8)                   |
| Total             | 772                 | 67                           | 24                        |
| Mean $\pm$ SEM, % |                     | 7.7 $\pm$ 1.3                | 2.8 $\pm$ 0.6             |
| CX4 1             | 108                 | 20 (18.5)                    | 7 (6.5)                   |
| CX4 2             | 102                 | 17 (16.7)                    | 6 (5.9)                   |
| CX4 3             | 119                 | 15 (12.6)                    | 2 (1.7)                   |
| Total             | 329                 | 45                           | 15                        |
| Mean $\pm$ SEM, % |                     | 15.9 $\pm$ 1.7               | 4.7 $\pm$ 1.5             |

Number and percentage (in parentheses) of metaphases with chromosomal breaks or translocations are indicated.

**Table S3. Summary of I-SceI joining experiments in v-Abl cell lines**

| Experiment       | X4 <sup>d/c</sup> X1 <sup>d/c</sup> | X4 <sup>-/-</sup> X1 <sup>-/-</sup> | X4 <sup>-/-</sup> | X4 <sup>-/-</sup> X1 <sup>d/-</sup> | X4 <sup>d/-</sup> X1 <sup>-/-</sup> |
|------------------|-------------------------------------|-------------------------------------|-------------------|-------------------------------------|-------------------------------------|
| <b>Clone 26</b>  |                                     |                                     |                   |                                     |                                     |
| 1                | 18.8                                | 2.6                                 | 2.5               | 3.9                                 |                                     |
| 2                | 11.9                                | 6.9                                 | 2.2               | 3.4                                 |                                     |
| 3                | 27.9                                | 3.6                                 | 5.0               | 3.4                                 |                                     |
| 4                | 26.3                                | 5.0                                 | 4.2               |                                     |                                     |
| 5                | 23.9                                | 4.0                                 |                   |                                     |                                     |
| 6                | 19.9                                | 3.9                                 |                   |                                     |                                     |
| 7                | 15.2                                | 7.6                                 |                   |                                     |                                     |
| Mean ± SEM, %    | 20.6 ± 2.2                          | 4.8 ± 0.7                           | 3.5 ± 0.7         | 3.6 ± 0.2                           |                                     |
| <b>Clone 27</b>  |                                     |                                     |                   |                                     |                                     |
| 1                | 45.4                                | 7.2                                 |                   | 4.9                                 | 23.7                                |
| 2                | 38.4                                | 10.5                                |                   | 5.4                                 | 30.4                                |
| 3                | 35.2                                | 4.3                                 |                   | 3.8                                 | 23.7                                |
| 4                | 18.0                                | 3.4                                 |                   | 3.3                                 | 31.3                                |
| 5                | 41.8                                | 4.8                                 |                   |                                     | 32.3                                |
| 6                | 37.0                                | 4.3                                 |                   |                                     |                                     |
| 7                | 42.3                                | 3.0                                 |                   |                                     |                                     |
| 8                | 39.7                                | 7.7                                 |                   |                                     |                                     |
| 9                | 34.3                                | 3.0                                 |                   |                                     |                                     |
| 10               | 42.6                                | 2.5                                 |                   |                                     |                                     |
| 11               | 35.3                                | 3.8                                 |                   |                                     |                                     |
| 12               |                                     | 3.4                                 |                   |                                     |                                     |
| Mean ± SEM, %    | 37.3 ± 2.2                          | 4.8 ± 0.5                           |                   | 4.4 ± 0.5                           | 28.3 ± 0.9                          |
| <b>Clone 150</b> |                                     |                                     |                   |                                     |                                     |
| 1                | 37.0                                | 5.0                                 |                   |                                     | 15.4                                |
| 2                | 16.0                                | 6.3                                 |                   |                                     | 15.9                                |
| 3                | 22.2                                | 4.3                                 |                   |                                     | 20.3                                |
| 4                | 28.3                                | 4.6                                 |                   |                                     | 21.6                                |
| 5                | 15.7                                | 4.2                                 |                   |                                     | 9.7                                 |
| 6                | 16.7                                | 4.4                                 |                   |                                     |                                     |
| 7                | 31.5                                | 5.2                                 |                   |                                     |                                     |
| 8                | 21.8                                | 3.0                                 |                   |                                     |                                     |
| 9                | 35.1                                | 2.8                                 |                   |                                     |                                     |
| 10               | 25.7                                | 3.8                                 |                   |                                     |                                     |
| 11               | 11.4                                | 3.6                                 |                   |                                     |                                     |
| 12               | 13.4                                | 4.5                                 |                   |                                     |                                     |
| 13               | 21.8                                | 5.1                                 |                   |                                     |                                     |
| 14               | 29.0                                | 5.3                                 |                   |                                     |                                     |
| 15               | 11.7                                | 3.1                                 |                   |                                     |                                     |
| 16               | 22.7                                | 2.5                                 |                   |                                     |                                     |
| 17               | 15.1                                | 4.2                                 |                   |                                     |                                     |
| 18               |                                     | 4.2                                 |                   |                                     |                                     |
| 19               |                                     | 4.3                                 |                   |                                     |                                     |
| 20               |                                     | 3.2                                 |                   |                                     |                                     |
| Mean ± SEM, %    | 22.1 ± 1.9                          | 4.2 ± 0.2                           |                   |                                     | 16.6 ± 2.1                          |

End-joining is indicated by the percentage of GFP-positive cells after 4 d of TA induction. All subclones of clones no. 26, 27, and 150 contain a single, unique copy of the I-SceI-joining substrate. Additional *Xrcc4*<sup>-/-</sup> clones (nos. 47 and 84) with different single-copy substrate integration were also analyzed (Table S4).

**Table S4. Summary of additional X4<sup>-/-</sup> clones with single and distinct I-SceI substrate integration**

| Experiment    | No. 47    | No. 84    |
|---------------|-----------|-----------|
| 1             | 6.3       | 4.8       |
| 2             | 6.0       | 3.5       |
| 3             | 3.0       | 3.4       |
| 4             | 3.2       |           |
| Mean ± SEM, % | 4.6 ± 1.8 | 3.9 ± 0.5 |

End-joining is indicated by the percentage of GFP-positive cells after 4 d of TA induction.

**Table S5. Summary of switch region junctions in stimulated CH12F3 B cells**

|                                  | Dir.      | MH          | Dir. + MH | Ins. | Total |
|----------------------------------|-----------|-------------|-----------|------|-------|
| <i>Lig4<sup>-/-</sup> shCtrl</i> |           |             |           |      |       |
| Exp. 1                           | 0 (0.0)   | 10 (100.0)  | 10 (100)  | 4    | 14    |
| Exp. 2                           | 1 (9.1)   | 10 (90.9)   | 11 (100)  | 2    | 13    |
| Exp. 3                           | 0 (0.0)   | 9 (100.0)   | 9 (100)   | 5    | 14    |
| Mean ± SEM, %                    | 3.0 ± 3.0 | 97.0 ± 3.0  |           |      |       |
| <i>Lig4<sup>-/-</sup> shLig3</i> |           |             |           |      |       |
| Exp. 1                           | 0 (0.0)   | 6 (100.0)   | 6 (100)   | 2    | 8     |
| Exp. 2                           | 0 (0.0)   | 2 (100.0)   | 2 (100)   | 2    | 4     |
| Exp. 3                           | 0 (0.0)   | 9 (100.0)   | 9 (100)   | 6    | 15    |
| Mean ± SEM, %                    | 0.0 ± 0.0 | 100.0 ± 0.0 |           |      |       |

Percentages of direct (Dir.) and MH-mediated (MH) junctions are shown in parentheses. Percentages are calculated based on the total number of junctions, excluding insertions (Ins.). Exp., experiment.
